# Supplementary material for: Crucial Role of IL1beta and C3a in the In Vitro-Response of Multipotent Mesenchymal Stromal Cells to Inflammatory Mediators of Polytrauma
Source: PubMed Central journal article supplement (PMC4285554; doi:10.1371/journal.pone.0116772), 2015-01-06
Supplement: pone.0116772.s002.pdf [file pone.0116772.s002.pdf]

| CD<br>marker | % positive |         |
|--------------|------------|---------|
|              | donor 1    | donor 2 |
| CD45         | 0.3        | 0.9     |
| CD90         | 99.0       | 98.3    |
| CD73         | 99.5       | 98.5    |
| CD105        | 99.6       | 99.5    |
| CD29         | 99.7       | 99.9    |
| CD166        | 99.2       | 99.8    |
