# Supplementary material for: Crucial Role of IL1beta and C3a in the In Vitro-Response of Multipotent Mesenchymal Stromal Cells to Inflammatory Mediators of Polytrauma
Source: PubMed Central journal article supplement (PMC4285554; doi:10.1371/journal.pone.0116772), 2015-01-06
Supplement: pone.0116772.s005.pdf [file pone.0116772.s005.pdf]

| Gene Name | PTC         |          | 0.2 ng/ml IL1b |          | 10 ng/ml IL1b |          |
|-----------|-------------|----------|----------------|----------|---------------|----------|
|           | Fold Change | p-Value  | Fold Change    | p-Value  | Fold Change   | p-Value  |
| IL8       | 935.5832    | 0.000001 | 649.4414       | 0.000447 | 1269.2163     | 0.000289 |
| CXCL6     | 556.6226    | 0.002538 | 430.7048       | 0.001839 | 336.3662      | 0.048848 |
| C3        | 335.0089    | 0.001624 | 258.0289       | 0.000801 | 372.5755      | 0.000004 |
| CXCL3     | 323.9713    | 0.000376 | 223.8501       | 0.006314 | 325.4718      | 0.004529 |
| CXCL1     | 245.0992    | 0.000013 | 183.617        | 0.001649 | 224.4975      | 0.007474 |
| CXCL5     | 167.8919    | 0.04321  | 92.074         | 0.053091 | 132.03        | 0.010926 |
| IL6       | 166.9249    | 0.009034 | 116.9479       | 0.001017 | 238.8105      | 0.014677 |
| CXCL2     | 125.3417    | 0.000682 | 100.8725       | 0.002429 | 141.0167      | 0.007164 |
| CCL2      | 107.8629    | 0.003789 | 105.1561       | 0.003414 | 86.2063       | 0.026496 |
| CXCL10    | 78.9603     | 0.105352 | 76.447         | 0.112145 | 30.6197       | 0.195951 |
| CCL8      | 44.9595     | 0.054343 | 31.7912        | 0.028959 | 54.7159       | 0.093791 |
| CCL5      | 36.2453     | 0.013579 | 19.156         | 0.041189 | 44.8299       | 0.061724 |
| IL1B      | 18.4501     | 0.000253 | 6.0303         | 0.004973 | 20.3773       | 0.049768 |
| CCL7      | 9.1825      | 0.021877 | 7.305          | 0.039448 | 6.927         | 0.064521 |
| CSF1      | 6.6794      | 0.0136   | 5.9507         | 0.027727 | 6.4668        | 0.033704 |
| IL1A      | 6.1998      | 0.039571 | 3.4635         | 0.162601 | 10.4027       | 0.020162 |
| TLR3      | 3.6336      | 0.031821 | 3.4695         | 0.027354 | 2.6294        | 0.177186 |
| TLR2      | 3.2241      | 0.084592 | 2.9463         | 0.070467 | 2.7363        | 0.195736 |
| CXCL9     | 2.9943      | 0.230963 | 2.192          | 0.37268  | 2.8197        | 0.275829 |
| RIPK2     | 2.6324      | 0.005529 | 2.389          | 0.003729 | 2.8674        | 0.004277 |
| C3AR1     | 2.3304      | 0.123244 | 1.9326         | 0.178117 | 2.869         | 0.017881 |
| CD40      | 2.3304      | 0.111596 | 1.3921         | 0.615088 | 1.6402        | 0.321454 |
| IL1R1     | 2.2824      | 0.07398  | 2.1593         | 0.076913 | 2.3793        | 0.071496 |
| CEBPB     | 2.1568      | 0.000274 | 2.0077         | 0.002686 | 2.2329        | 0.046973 |
| NFKB1     | 2.0054      | 0.002882 | 1.9148         | 0.010099 | 2.3793        | 0.000064 |
| C4A       | 1.9159      | 0.066011 | 1.5455         | 0.322788 | 1.5816        | 0.180265 |
| MYD88     | 1.7059      | 0.037569 | 1.4312         | 0.132424 | 1.6402        | 0.100048 |
| CCL13     | 1.5652      | 0.543005 | 2.1531         | 0.149077 | 1.2626        | 0.939451 |
| TNF       | 1.5643      | 0.474025 | 1.7317         | 0.477467 | 2.7174        | 0.146222 |
| CCL11     | 1.5598      | 0.542554 | 2.7857         | 0.137129 | 1.6951        | 0.567374 |
| LY96      | 1.5304      | 0.030155 | 1.4082         | 0.09422  | 1.7418        | 0.007443 |
| CCL3      | 1.4765      | 0.221497 | 1.0985         | 0.784752 | 2.4434        | 0.102054 |
| BCL6      | 1.4537      | 0.640718 | 1.4842         | 0.588589 | 1.6279        | 0.454726 |
| IL1RN     | 1.4312      | 0.742833 | 0.8412         | 0.627348 | 2.797         | 0.151031 |
| FLT3LG    | 1.4304      | 0.066025 | 1.3346         | 0.189229 | 1.3071        | 0.282939 |
| ITGB2     | 1.2359      | 0.766163 | 1.256          | 0.752509 | 1.3369        | 0.981559 |
| TLR4      | 1.2105      | 0.419549 | 1.1216         | 0.645204 | 1.0709        | 0.834192 |
| IL10RB    | 1.1835      | 0.1978   | 1.0447         | 0.781704 | 1.1248        | 0.460461 |
| TLR5      | 1.1565      | 0.874143 | 1.0161         | 0.867269 | 0.9307        | 0.678275 |
| TIRAP     | 1.1491      | 0.182877 | 1.1438         | 0.220403 | 0.9442        | 0.975479 |
| IL23A     | 1.0878      | 0.791418 | 0.9669         | 0.854108 | 1.1876        | 0.495227 |
| TOLLIP    | 1.0747      | 0.67404  | 1.0357         | 0.885645 | 0.9356        | 0.69568  |
| IL6R      | 1.0465      | 0.949079 | 1.1746         | 0.63417  | 1.0586        | 0.713814 |
| TLR1      | 1.0405      | 0.771544 | 0.7239         | 0.052503 | 0.8201        | 0.624785 |
| IL1RAP    | 1.0381      | 0.651749 | 0.9619         | 0.657041 | 1.405         | 0.221753 |
| HDAC4     | 1.0363      | 0.827516 | 0.9232         | 0.75311  | 0.958         | 0.831497 |
| TLR6      | 0.9992      | 0.748608 | 1.0062         | 0.741739 | 0.7949        | 0.533445 |
| CCR1      | 0.9906      | 0.691723 | 0.8215         | 0.615311 | 0.7252        | 0.539721 |
| NR3C1     | 0.9843      | 0.86077  | 0.9442         | 0.680499 | 0.9708        | 0.802987 |
| IL18      | 0.9259      | 0.651677 | 0.7608         | 0.833864 | 1.4197        | 0.395014 |
| TNFSF14   | 0.834       | 0.548361 | 0.9042         | 0.620082 | 0.7551        | 0.487199 |
| CCL19     | 0.7494      | 0.602362 | 0.6172         | 0.51585  | 0.7156        | 0.507798 |
| LTB       | 0.7349      | 0.52287  | 0.8902         | 0.655543 | 1.0513        | 0.849879 |
| IL10      | 0.7206      | 0.547117 | 0.7687         | 0.546032 | 0.7617        | 0.577668 |
| IL9       | 0.7197      | 0.513563 | 0.6547         | 0.561042 | 1.822         | 0.384353 |
| CCL4      | 0.7197      | 0.513563 | 0.6547         | 0.561042 | 1.0784        | 0.739262 |
| CCL16     | 0.7197      | 0.513563 | 0.6547         | 0.561042 | 0.759         | 0.548497 |
| CCL17     | 0.7197      | 0.513563 | 0.6547         | 0.561042 | 0.759         | 0.548497 |
| CCL22     | 0.7197      | 0.513563 | 0.6547         | 0.561042 | 0.759         | 0.548497 |
| CCR2      | 0.7197      | 0.513563 | 0.6547         | 0.561042 | 0.759         | 0.548497 |
| CCR3      | 0.7197      | 0.513563 | 0.6547         | 0.561042 | 0.759         | 0.548497 |
| CCR4      | 0.7197      | 0.513563 | 0.6547         | 0.561042 | 0.759         | 0.548497 |
| CD40LG    | 0.7197      | 0.513563 | 0.6547         | 0.561042 | 0.759         | 0.548497 |
| CRP       | 0.7197      | 0.513563 | 0.6547         | 0.561042 | 0.759         | 0.548497 |
| CXCR4     | 0.7197      | 0.513563 | 0.6547         | 0.561042 | 0.759         | 0.548497 |
| FASLG     | 0.7197      | 0.513563 | 0.6547         | 0.561042 | 0.759         | 0.548497 |
| IFNG      | 0.7197      | 0.513563 | 0.6547         | 0.561042 | 0.759         | 0.548497 |
| IL18RAP   | 0.7197      | 0.513563 | 0.6547         | 0.561042 | 0.759         | 0.548497 |
| IL1F10    | 0.7197      | 0.513563 | 0.6547         | 0.561042 | 0.759         | 0.548497 |
| IL22      | 0.7197      | 0.513563 | 0.6547         | 0.561042 | 0.759         | 0.548497 |
| IL22RA2   | 0.7197      | 0.513563 | 0.6547         | 0.561042 | 0.759         | 0.548497 |
| IL23R     | 0.7197      | 0.513563 | 0.6547         | 0.561042 | 0.759         | 0.548497 |
| CXCR1     | 0.7197      | 0.513563 | 0.6547         | 0.561042 | 0.759         | 0.548497 |
| CXCR2     | 0.7197      | 0.513563 | 0.6547         | 0.561042 | 0.759         | 0.548497 |
| KNG1      | 0.7197      | 0.513563 | 0.6547         | 0.561042 | 0.759         | 0.548497 |
| LTA       | 0.7197      | 0.513563 | 0.7082         | 0.592167 | 0.759         | 0.548497 |
| TLR7      | 0.7013      | 0.528771 | 0.6634         | 0.538551 | 0.698         | 0.593537 |
| CCR7      | 0.6634      | 0.447917 | 1.103          | 0.758727 | 1.2847        | 0.931546 |
| FOS       | 0.6596      | 0.383884 | 0.7595         | 0.385149 | 0.6797        | 0.413135 |
| CCL21     | 0.6475      | 0.442428 | 0.5986         | 0.519363 | 0.6829        | 0.476009 |
| NOS2      | 0.6287      | 0.457553 | 0.5719         | 0.507535 | 0.8088        | 0.897295 |
| CCL24     | 0.6158      | 0.450728 | 0.6509         | 0.516511 | 0.7477        | 0.557992 |
| CCL23     | 0.4505      | 0.459714 | 0.4194         | 0.54414  | 1.2891        | 0.947368 |
| NFATC3    | 0.2278      | 0.213311 | 0.8422         | 0.136185 | 0.9855        | 0.942494 |
